# Supplementary material
Source: MDPI journal article supplement (https://www.mdpi.com/2072-4292/4/9/2661)
Supplement: s1 [file s1]

**Supplementary**

**Table S1.** Confusion matrix for the 4 main tree species using the 8 bands of WorldView-2 and object-based LDA classification (horizontal line separates coniferous and broadleaf trees).

| **Classified as** | **Reference Data** | | | | |  |  | **User’s Acc.** |
| --- | --- | --- | --- | --- | --- | --- | --- | --- |
| **PA** | **PS** |  | **FS** | **QR** |  | **Σ** |
| PA | 208 | 26 |  | 0 | 0 |  | 234 | 0.889 |
| PS | 16 | 209 |  | 0 | 0 |  | 225 | 0.929 |
| FS | 0 | 0 |  | 245 | 2 |  | 247 | 0.992 |
| QR | 2 | 0 |  | 2 | 150 |  | 154 | 0.974 |
| Σ | 226 | 235 |  | 247 | 152 |  | 860 |  |
| Prod. acc. | 0.920 | 0.889 |  | 0.992 | 0.987 |  |  | 0.944 |

**Table S2.** Confusion matrix for the 10 tree species using the 8 bands of WorldView-2 and object-based LDA classification (horizontal line separates coniferous and broadleaf trees).

| **Classified as** | **Reference Data** | | | | | | | | | | |  | |  | |  | |
| --- | --- | --- | --- | --- | --- | --- | --- | --- | --- | --- | --- | --- | --- | --- | --- | --- | --- |
| **PA** | **PS** | **LD** | **PM** | **CL** |  | **FS** | **QR** | **CB** | **BP** | **AG** | |  | **Σ** | **User’s acc.** | |
| PA | 182 | 17 | 19 | 29 | 0 |  | 0 | 0 | 0 | 0 | 0 | |  | 247 | 0.737 | |
| PS | 12 | 205 | 20 | 8 | 0 |  | 0 | 0 | 0 | 0 | 0 | |  | 245 | 0.837 | |
| LD | 14 | 12 | 79 | 5 | 2 |  | 0 | 0 | 0 | 0 | 0 | |  | 112 | 0.705 | |
| PM | 17 | 1 | 3 | 136 | 0 |  | 0 | 0 | 0 | 0 | 1 | |  | 158 | 0.861 | |
| CL | 0 | 0 | 0 | 0 | 33 |  | 0 | 0 | 0 | 2 | 3 | |  | 38 | 0.868 | |
| FS | 0 | 0 | 0 | 0 | 0 |  | 237 | 0 | 18 | 0 | 2 | |  | 257 | 0.922 | |
| QR | 1 | 0 | 1 | 0 | 0 |  | 1 | 144 | 10 | 0 | 4 | |  | 161 | 0.894 | |
| CB | 0 | 0 | 0 | 0 | 0 |  | 9 | 4 | 44 | 1 | 0 | |  | 58 | 0.759 | |
| BP | 0 | 0 | 0 | 0 | 0 |  | 0 | 0 | 5 | 79 | 2 | |  | 86 | 0.919 | |
| AG | 0 | 0 | 0 | 0 | 7 |  | 0 | 4 | 4 | 4 | 84 | |  | 103 | 0.816 | |
| Σ | 226 | 235 | 122 | 178 | 42 |  | 247 | 152 | 81 | 86 | 96 | |  | 1465 |  | |
| Prod. acc. | 0.805 | 0.872 | 0.648 | 0.764 | 0.786 |  | 0.960 | 0.947 | 0.543 | 0.919 | 0.875 | |  |  | 0.835 | |

**Table S3.** Confusion matrix for the 10 tree species using the 4 standard bands of WorldView-2 and object-based LDA classification (horizontal line separates coniferous and broadleaf trees).

| **Classified as** | **Reference data** | | | | | | | | | | |  | |  | |  | |
| --- | --- | --- | --- | --- | --- | --- | --- | --- | --- | --- | --- | --- | --- | --- | --- | --- | --- |
| **PA** | **PS** | **LD** | **PM** | **CL** |  | **FS** | **QR** | **CB** | **BP** | **AG** | |  | **Σ** | **User’s acc.** | |
| PA | 167 | 11 | 19 | 33 | 0 |  | 0 | 0 | 0 | 0 | 0 | |  | 230 | 0.726 | |
| PS | 12 | 205 | 22 | 10 | 0 |  | 0 | 0 | 0 | 0 | 0 | |  | 249 | 0.823 | |
| LD | 10 | 15 | 72 | 11 | 1 |  | 0 | 0 | 1 | 0 | 0 | |  | 110 | 0.655 | |
| PM | 36 | 4 | 8 | 121 | 0 |  | 0 | 0 | 0 | 0 | 0 | |  | 169 | 0.716 | |
| CL | 1 | 0 | 0 | 2 | 37 |  | 0 | 0 | 0 | 1 | 4 | |  | 45 | 0.822 | |
| FS | 0 | 0 | 0 | 0 | 0 |  | 229 | 0 | 32 | 0 | 2 | |  | 263 | 0.871 | |
| QR | 0 | 0 | 1 | 0 | 0 |  | 1 | 143 | 18 | 0 | 2 | |  | 165 | 0.867 | |
| CB | 0 | 0 | 0 | 0 | 0 |  | 17 | 6 | 21 | 1 | 0 | |  | 45 | 0.467 | |
| BP | 0 | 0 | 0 | 0 | 0 |  | 0 | 0 | 5 | 75 | 6 | |  | 86 | 0.872 | |
| AG | 0 | 0 | 0 | 1 | 4 |  | 0 | 3 | 4 | 9 | 82 | |  | 103 | 0.796 | |
| Σ | 226 | 235 | 122 | 178 | 42 |  | 247 | 152 | 81 | 86 | 96 | |  | 1465 |  | |
| Prod. acc. | 0.739 | 0.872 | 0.590 | 0.680 | 0.881 |  | 0.927 | 0.941 | 0.259 | 0.872 | 0.854 | |  |  | 0.786 | |

**Table S4.** Confusion matrix for the 10 tree species using the 8 bands of WorldView-2 and pixel-based RF classification (horizontal line separates coniferous and broadleaf trees).

| **Classified as** | **Reference Data** | | | | | | | | | | |  | |  |  | |
| --- | --- | --- | --- | --- | --- | --- | --- | --- | --- | --- | --- | --- | --- | --- | --- | --- |
| **PA** | **PS** | **LD** | **PM** | **CL** |  | **FS** | **QR** | **CB** | **BP** | **AG** | |  | **Σ** | **User’s Acc.** |
| PA | 742 | 136 | 157 | 233 | 10 |  | 2 | 20 | 3 | 5 | 11 | |  | 1,319 | 0.563 |
| PS | 130 | 623 | 59 | 61 | 0 |  | 0 | 7 | 1 | 0 | 0 | |  | 881 | 0.707 |
| LD | 62 | 31 | 197 | 25 | 0 |  | 1 | 10 | 4 | 8 | 4 | |  | 342 | 0.576 |
| PM | 113 | 13 | 33 | 321 | 7 |  | 2 | 19 | 0 | 3 | 8 | |  | 519 | 0.618 |
| CL | 1 | 0 | 2 | 7 | 97 |  | 1 | 2 | 1 | 16 | 4 | |  | 131 | 0.740 |
| FS | 0 | 0 | 0 | 0 | 0 |  | 1,303 | 108 | 178 | 3 | 11 | |  | 1,603 | 0.813 |
| QR | 33 | 4 | 18 | 27 | 11 |  | 174 | 1,568 | 187 | 18 | 103 | |  | 2,143 | 0.732 |
| CB | 0 | 0 | 1 | 0 | 0 |  | 32 | 14 | 30 | 7 | 2 | |  | 86 | 0.349 |
| BP | 0 | 0 | 2 | 2 | 12 |  | 0 | 0 | 28 | 317 | 34 | |  | 395 | 0.803 |
| AG | 3 | 0 | 3 | 1 | 29 |  | 4 | 22 | 13 | 20 | 210 | |  | 305 | 0.689 |
| Σ | 1,084 | 807 | 472 | 677 | 166 |  | 1,519 | 1,770 | 445 | 397 | 387 | |  | 7724 |  |
| Prod. acc. | 0.685 | 0.772 | 0.417 | 0.474 | 0.584 |  | 0.858 | 0.886 | 0.067 | 0.798 | 0.543 | |  |  | 0.700 |

**Table S5.** Producer’s and user’s accuracies for the 10 tree species for the pixel-based and the object-based RF classification with 4 and 8 bands.

| **Tree Species** | **Producer’s Accuracies** | | | | |  | **User’s Accuracies** | | | | |
| --- | --- | --- | --- | --- | --- | --- | --- | --- | --- | --- | --- |
| **Object-Based Approach** | |  | **Pixel-Based Approach** | |  | **Object-Based Approach** | |  | **Pixel-Based Approach** | |
| **4 band** | **8 band** |  | **4 band** | **8 band** |  | **4 band** | **8 band** |  | **4 band** | **8 band** |
| Norway spruce (PA) | 0.739 | 0.801 |  | 0.671 | 0.696 |  | 0.746 | 0.804 |  | 0.581 | 0.607 |
| Scots pine (PS) | 0.868 | 0.898 |  | 0.753 | 0.779 |  | 0.829 | 0.851 |  | 0.743 | 0.763 |
| European larch (LD) | 0.516 | 0.664 |  | 0.381 | 0.428 |  | 0.583 | 0.704 |  | 0.501 | 0.596 |
| Douglas fir (PM) | 0.697 | 0.809 |  | 0.490 | 0.581 |  | 0.670 | 0.823 |  | 0.520 | 0.608 |
| Lawson’s cypress (CL) | 0.786 | 0.833 |  | 0.566 | 0.620 |  | 0.868 | 0.921 |  | 0.676 | 0.720 |
| European beech (FS) | 0.919 | 0.943 |  | 0.849 | 0.876 |  | 0.863 | 0.869 |  | 0.824 | 0.826 |
| English oak (QR) | 0.921 | 0.888 |  | 0.854 | 0.898 |  | 0.854 | 0.854 |  | 0.731 | 0.759 |
| European hornbeam (CB) | 0.296 | 0.333 |  | 0.148 | 0.157 |  | 0.490 | 0.574 |  | 0.398 | 0.579 |
| Silver birch (BP) | 0.872 | 0.907 |  | 0.738 | 0.781 |  | 0.872 | 0.886 |  | 0.759 | 0.838 |
| European alder (AG) | 0.823 | 0.854 |  | 0.584 | 0.618 |  | 0.775 | 0.796 |  | 0.675 | 0.718 |

**Table S6.** Producer’s and user’s accuracies for the 10 tree species for the pixel-based and the object-based LDA classification with 4 and 8 bands.

| **Tree Species** | **Producer’s Accuracies** | | | | |  | **User’s Accuracies** | | | | |
| --- | --- | --- | --- | --- | --- | --- | --- | --- | --- | --- | --- |
| **Object-Based Approach** | |  | **Pixel-Based Approach** | |  | **Object-Based Approach** | |  | **Pixel-Based Approach** | |
| **4 band** | **8 band** |  | **4 band** | **8 band** |  | **4 band** | **8 band** |  | **4 band** | **8 band** |
| Norway spruce (PA) | 0.739 | 0.805 |  | 0.698 | 0.685 |  | 0.726 | 0.737 |  | 0.516 | 0.563 |
| Scots pine (PS) | 0.872 | 0.872 |  | 0.748 | 0.772 |  | 0.823 | 0.837 |  | 0.668 | 0.707 |
| European larch (LD) | 0.590 | 0.648 |  | 0.337 | 0.417 |  | 0.655 | 0.705 |  | 0.508 | 0.576 |
| Douglas fir (PM) | 0.680 | 0.764 |  | 0.257 | 0.474 |  | 0.716 | 0.861 |  | 0.463 | 0.618 |
| Lawson’s cypress (CL) | 0.881 | 0.786 |  | 0.392 | 0.584 |  | 0.822 | 0.868 |  | 0.619 | 0.740 |
| European beech (FS) | 0.927 | 0.960 |  | 0.847 | 0.858 |  | 0.871 | 0.922 |  | 0.803 | 0.813 |
| English oak (QR) | 0.941 | 0.947 |  | 0.868 | 0.886 |  | 0.867 | 0.894 |  | 0.691 | 0.732 |
| European hornbeam (CB) | 0.259 | 0.543 |  | 0.002 | 0.067 |  | 0.467 | 0.759 |  | 0.111 | 0.349 |
| Silver birch (BP) | 0.872 | 0.919 |  | 0.756 | 0.798 |  | 0.872 | 0.919 |  | 0.703 | 0.803 |
| European alder (AG) | 0.854 | 0.875 |  | 0.491 | 0.543 |  | 0.796 | 0.816 |  | 0.640 | 0.689 |
